# Supplementary material for: Facile synthesis of high quality multi-walled carbon nanotubes on novel 3D KIT-6: application in high performance dye-sensitized solar cells
Source: Royal Society of Chemistry journal article supplement (doi:10.1039/c4nr05531d), 2014-11-10
Supplement: c4nr05531d1.pdf [file c4nr05531d1.pdf]

## Supporting Information

### Facile synthesis of high quality multi-walled carbon nanotubes on novel 3D

#### KIT-6: Application in high performance dye-sensitized solar cells

Jayaraman Balamurugan,<sup>a</sup> Arumugam Pandurangan,<sup>b\*</sup> Nam Hoon Kim,<sup>a</sup> Joong Hee Lee <sup>a,c\*</sup>

<sup>a</sup>*Advanced Materials Institute of BIN Technology (BK21 plus Global) & Dept. of BIN Fusion Technology, Chonbuk National University, Jeonju, Jeonbuk 561-756, Republic of Korea.*

<sup>b</sup>*Department of Chemistry, Institute of Catalysis and Petroleum Technology, Anna University, Chennai 600 025, India*

<sup>c</sup>*Carbon Composite Research Centre, Department of Polymer & Nanoscience and Technology, Chonbuk National University Jeonju, Jeonbuk 561-756, Republic of Korea*

\*Corresponding authors: E-Mail: [pandurangan\\_a@yahoo.com](mailto:pandurangan_a@yahoo.com) (Arumugam Pandurangan)

Fax: +91-44-22200660; Tel: +91-44-22358653

E-Mail: [jhl@jbnu.ac.kr](mailto:jhl@jbnu.ac.kr) (Joong Hee Lee)

Fax: +82 832702341; Tel: +82 832702342

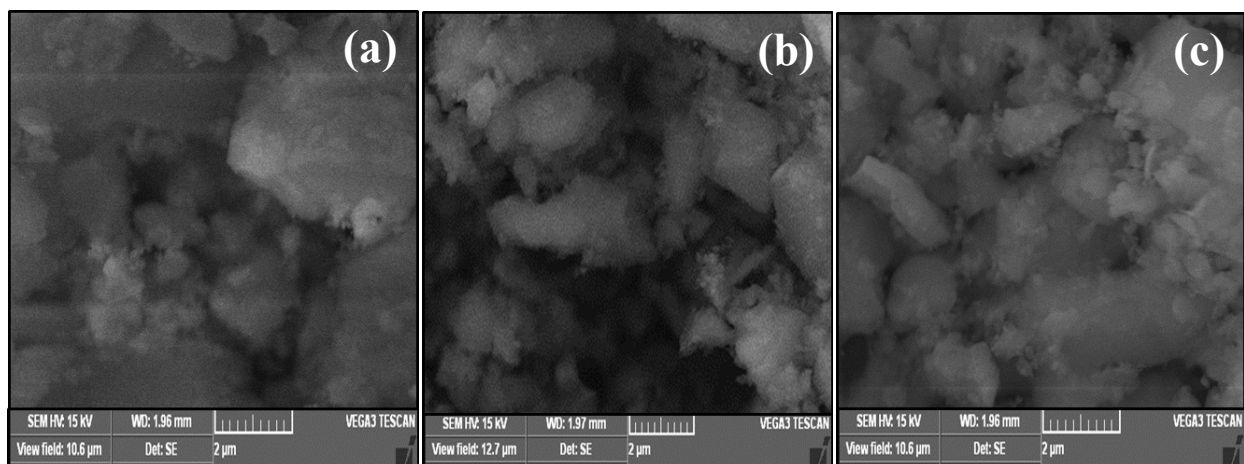

**Fig. S1** SEM images of a) Cr-KIT-6, (b) Ni-Cr-KIT-6 and (c) Co-Cr-KIT-6 mesoporous catalysts

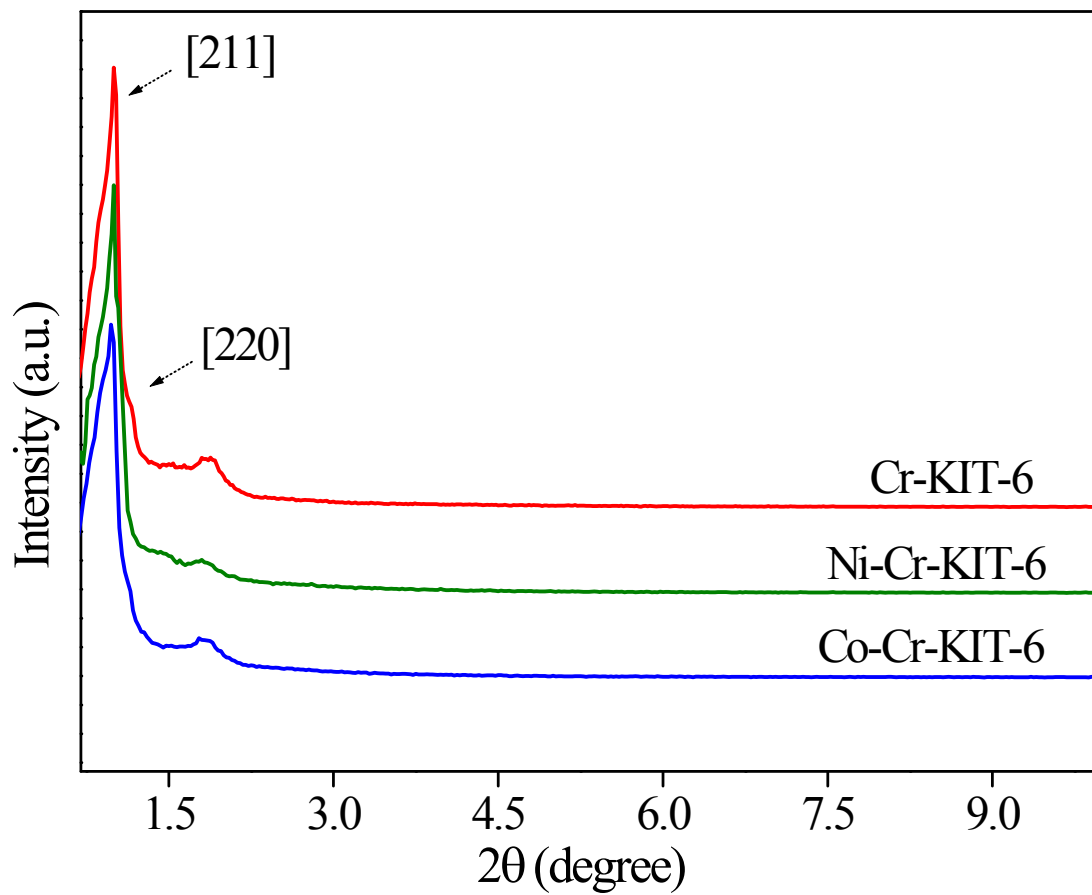

**Fig. S2** Small-angle X-ray diffraction patterns of (a) Cr-KIT-6, (b) Ni-Cr-KIT-6 and (c) Co-Cr-KIT-6 mesoporous catalysts

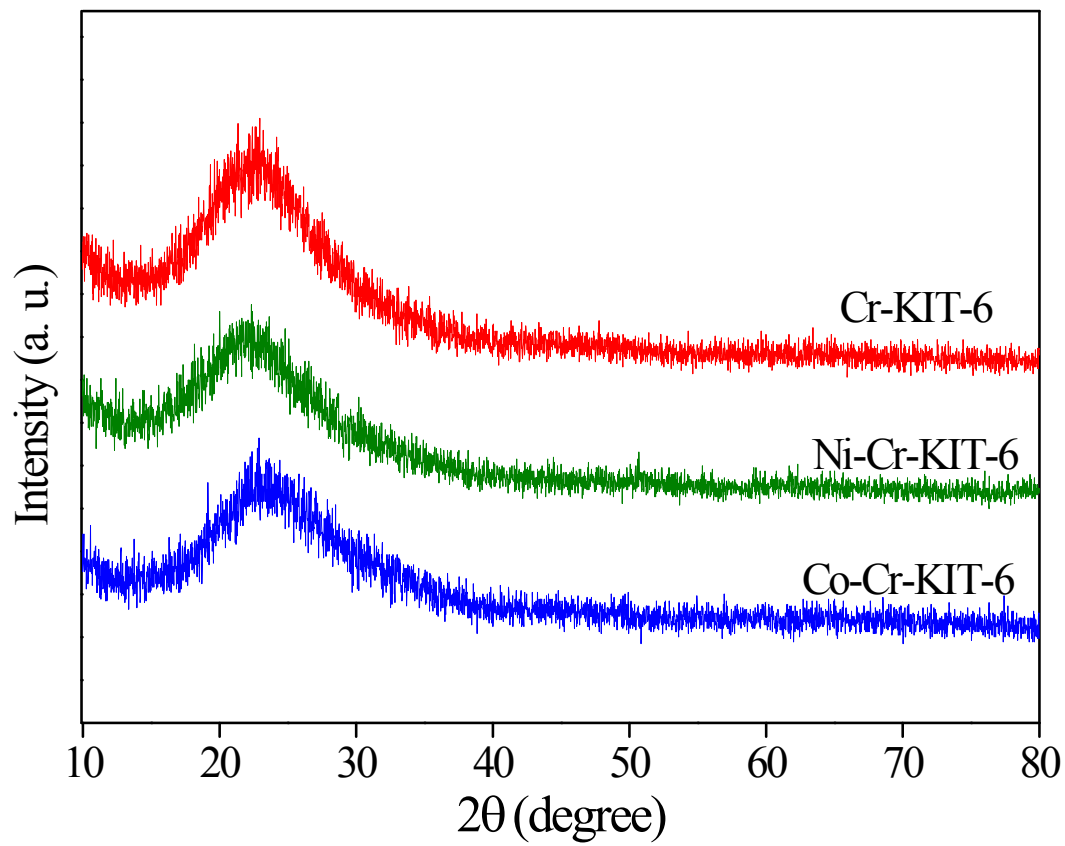

**Fig. S3** Wide-angle X-ray diffraction patterns of (a) Cr-KIT-6, (b) Ni-Cr-KIT-6 and (c) Co-Cr-KIT-6 mesoporous catalysts

The FT-IR spectra of the as-synthesized and calcined mesoporous materials (Cr-KIT-6, Ni-Cr-KIT-6 and Co-Cr-KIT-6) are shown in Fig. S4 (a) and Fig. S4 (b), respectively. The broad band appears around 3400–3500  $\text{cm}^{-1}$  is due to O–H stretching of surface hydroxyl groups, bridged hydroxyl groups and adsorbed water molecules. The adsorption bands around 2850 and 2975  $\text{cm}^{-1}$  corresponds to the symmetric and asymmetric stretching vibrations of  $-\text{CH}_2$  group of the structure directing template present in the pores of the as-synthesized mesoporous materials. The bands of 2850 and 2970  $\text{cm}^{-1}$  are disappeared in the calcined materials. It reveals that the template is fully removed from the mesoporous materials. The band between 450 and 1250  $\text{cm}^{-1}$  are assigned to the frame work vibrations of mesoporous materials [S1]. The asymmetric stretching vibrations of Si-O-Si and Si-O-M groups are observed between 950 and 1250  $\text{cm}^{-1}$  and the corresponding symmetric stretching modes are observed between 50 and 800  $\text{cm}^{-1}$ , the band at 460  $\text{cm}^{-1}$  is assigned to bending mode of Si-O-Si and Si-O-M groups in their respective mesoporous 3D KIT-6 materials.

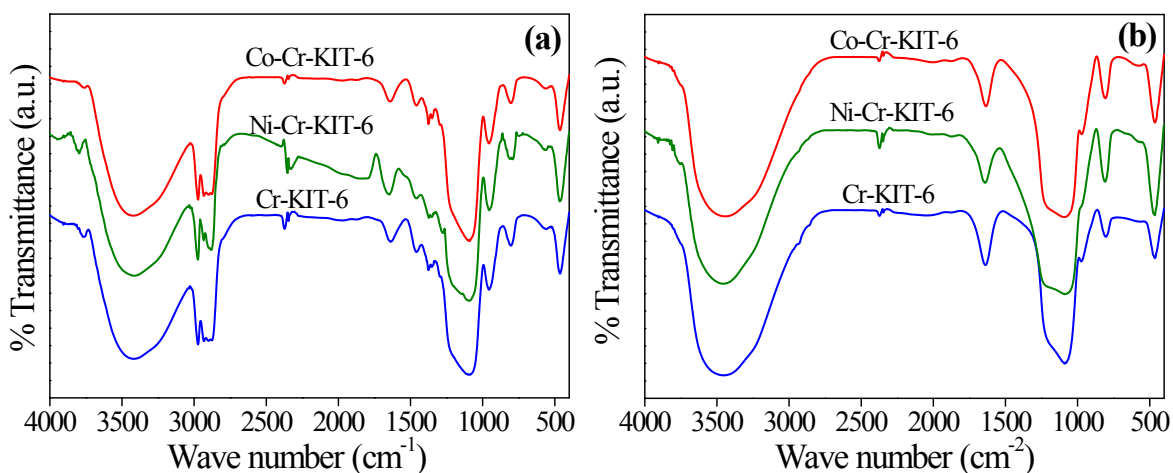

**Fig. S4** FT-IT spectra of (a) as-synthesized and (b) calcined Cr-KIT-6, Ni-Cr-KIT-6 and Co-Cr-KIT-6, respectively.

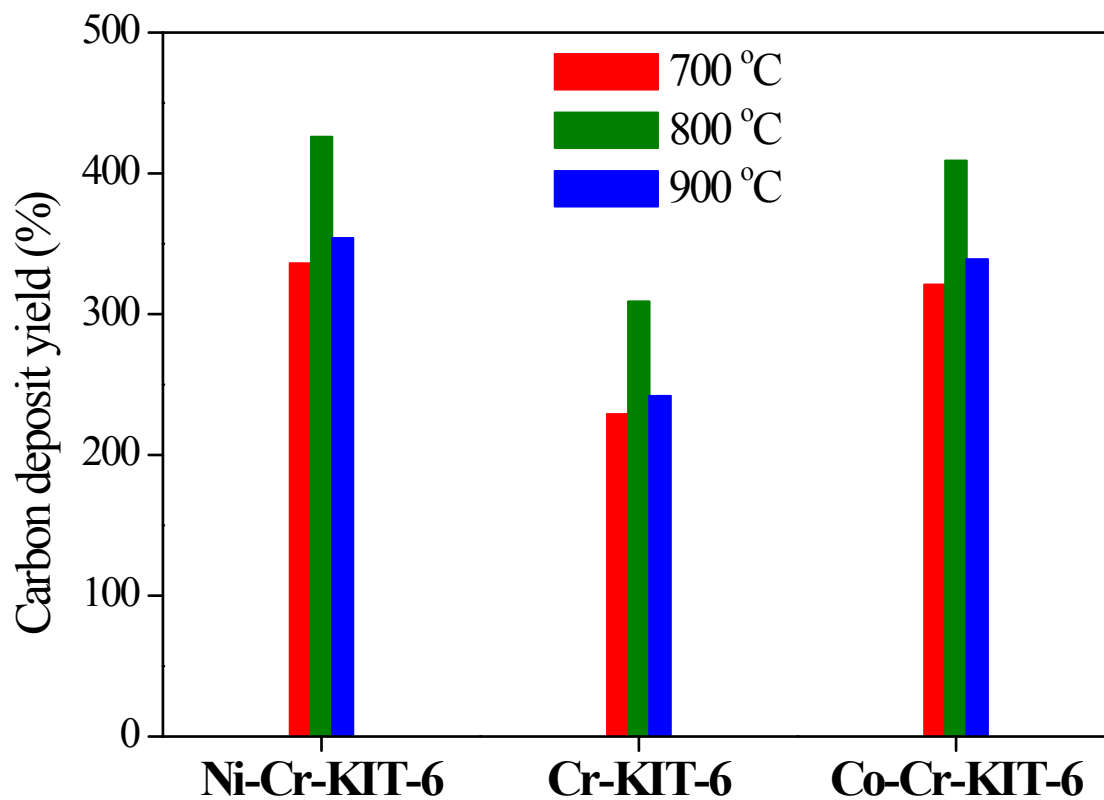

**Fig. S5** Effect of reaction temperature on the amount of carbon deposited yield over Cr-KIT-6, Ni-Cr-KIT-6 and Co-Cr-KIT-6 mesoporous catalysts (Catalyst: 200 mg, acetylene: 50 sccm/min, argon: 100 sccm/min, hydrogen: 100 sccm/min and Reaction time: 30 min).

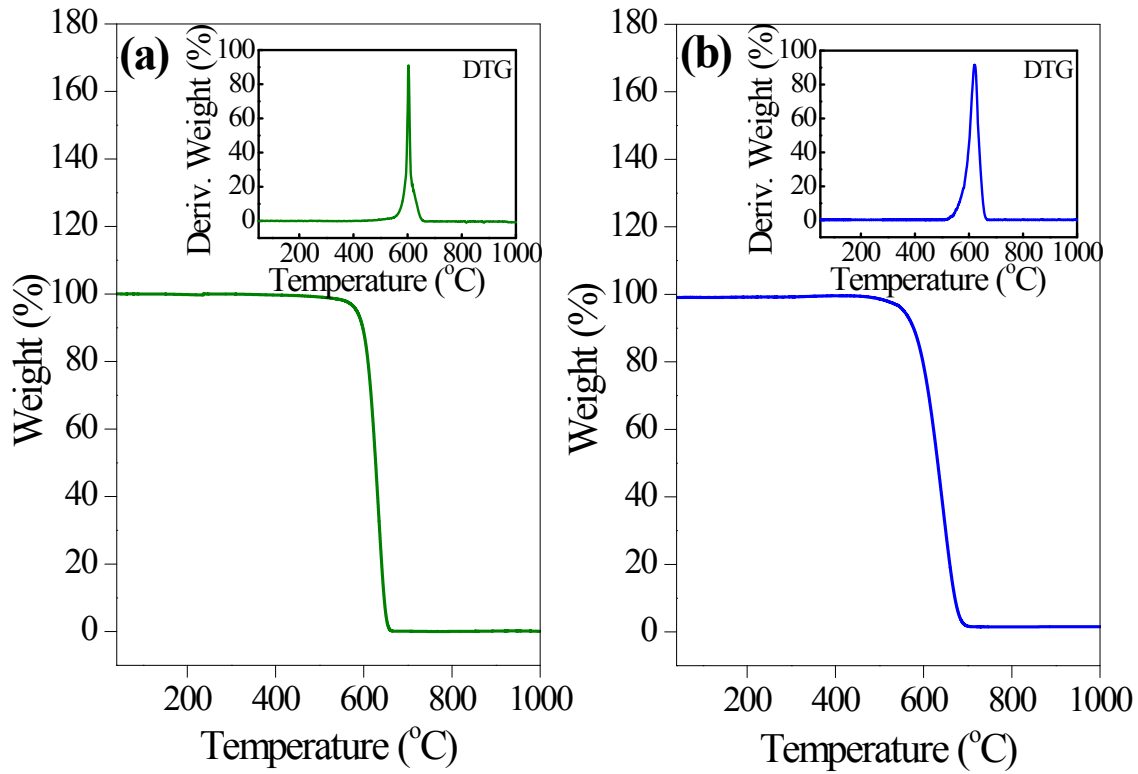

**Fig. S6** TGA and DTG analysis of (a) MWCNTs (growth over Ni-Cr-KIT-6) and (b) MWCNTs (growth over Co-Cr-KIT-6).

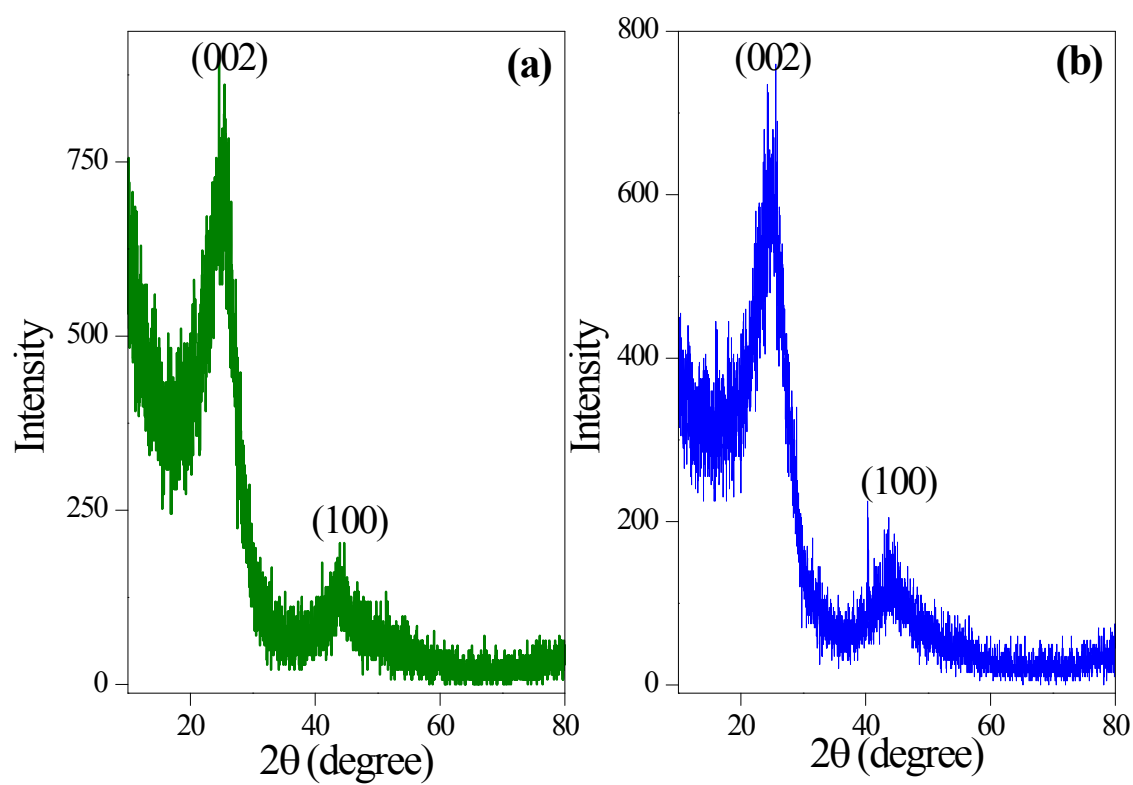

**Fig. S7** XRD pattern of (a) MWCNTs (growth over Ni-Cr-KIT-6) and (b) MWCNTs (growth over Co-Cr-KIT-6).



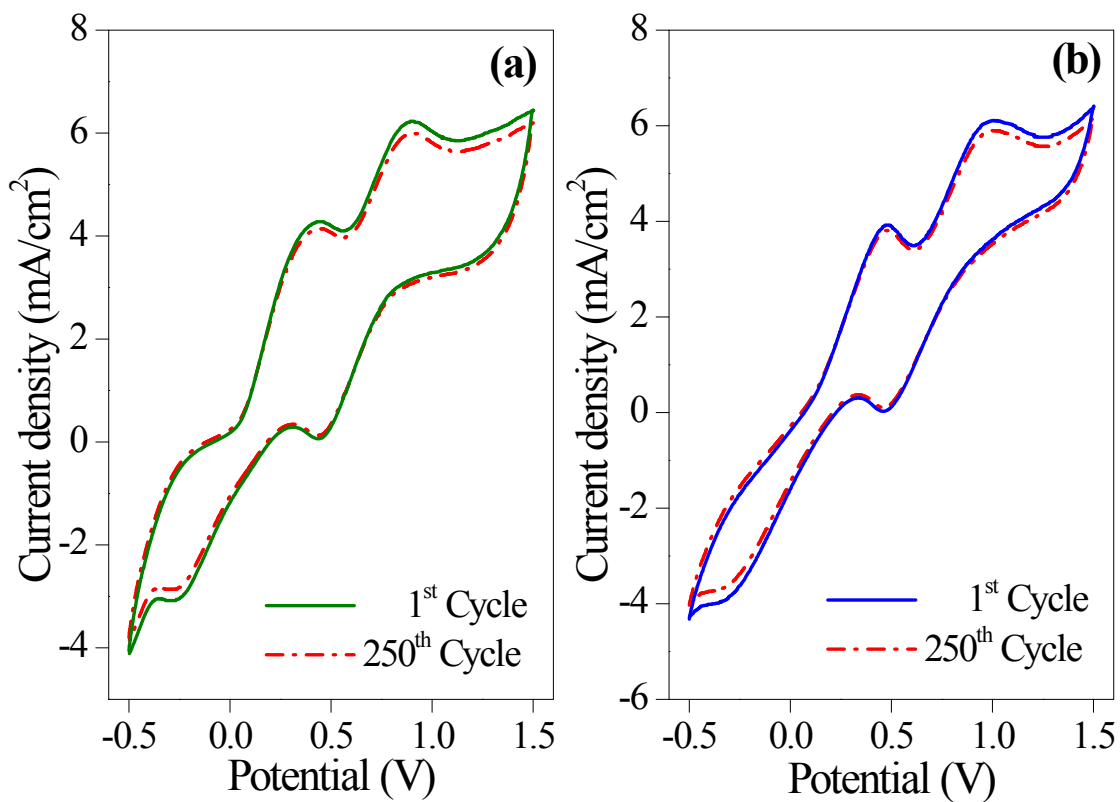

**Fig. S8** 250 consecutive cyclic voltammograms of (a) MWCNTs (growth over Ni-Cr-KIT-6) and (b) MWCNTs growth over Co-Cr-KIT-6) electrode in acetonitrile solution containing 10 mM LiI +1 mM I<sub>2</sub> + 0.1 M LiClO<sub>4</sub> at Scan rate 25 mV/s.

## Tables

**Table S1** Structural and textural properties of mesoporous Cr-KIT-6, Ni-Cr-KIT-6 and Co-Cr-KIT-6 catalysts.

| Catalysts   | d-spacing (nm) <sup>a</sup> | Unit cell parameter a <sub>0</sub> (nm) <sup>a</sup> | Surface area (m <sup>2</sup> g <sup>-1</sup> ) <sup>b</sup> | Pore size (nm) <sup>b</sup> | Pore volume (cc g <sup>-1</sup> ) <sup>b</sup> | Si/M ratio <sup>c</sup> (gel) | Si/M ratio <sup>d</sup> (gel) |
|-------------|-----------------------------|------------------------------------------------------|-------------------------------------------------------------|-----------------------------|------------------------------------------------|-------------------------------|-------------------------------|
| Cr-KIT-6    | 9.38                        | 19.6                                                 | 795                                                         | 5.95                        | 1.0783                                         | 50                            | 50.6                          |
| Ni-Cr-KIT-6 | 9.34                        | 19.2                                                 | 789                                                         | 5.84                        | 1.0723                                         | 50                            | 49.6                          |
| Co-Cr-KIT-6 | 9.41                        | 19.7                                                 | 791                                                         | 5.89                        | 1.0746                                         | 50                            | 48.8                          |

<sup>a</sup>The values are obtained from small-angle XRD pattern

<sup>b</sup>The values are obtained from N<sub>2</sub> adsorption-desorption isotherm analysis

<sup>c</sup>The values are calculated from the gel (M = Cr, Ni-Cr & Co-Cr)

<sup>d</sup>The values are obtained from ICP-AES analysis (M = Cr, Ni-Cr & Co-Cr)

**Table S2** Influence of catalysts for the growth of MWCNTs at the reaction time of 30 min.

| Catalysts      | Carbon deposition (%) |
|----------------|-----------------------|
| Co-KIT-6 (25)  | 269.97                |
| Co-KIT-6 (50)  | 308.88                |
| Co-KIT-6 (75)  | 275.43                |
| Co-KIT-6 (100) | 209.76                |

Flow rate of C<sub>2</sub>H<sub>2</sub>: 50 sccm/min, argon: 100 sccm/min, hydrogen: 100 sccm/min and temperature: 800°C

**Table S3** Influence of acetylene flow rate on the amount of carbon deposit yield over Ni-Cr-KIT-6 and Co-Cr-KIT-6 catalyst (Catalyst: 100 mg, Argon: 100 sccm/min, H<sub>2</sub>: 100 sccm/min, reaction time: 30 min and temperature: 800 °C).

| <b>Catalyst</b> | <b>Flow rate<br/>of C<sub>2</sub>H<sub>2</sub><br/>(sccm/min)</b> | <b>Carbon<br/>deposition<br/>(%)</b> | <b>Catalyst</b> | <b>Flow rate<br/>of C<sub>2</sub>H<sub>2</sub><br/>(sccm/min)</b> | <b>Carbon<br/>deposition<br/>(%)</b> |
|-----------------|-------------------------------------------------------------------|--------------------------------------|-----------------|-------------------------------------------------------------------|--------------------------------------|
| Ni-Cr-KIT-6     | 10                                                                | 109.89                               | Co-Cr-KIT-6     | 10                                                                | 116.74                               |
|                 | 20                                                                | 267.89                               |                 | 20                                                                | 271.08                               |
|                 | 30                                                                | 341.97                               |                 | 30                                                                | 328.71                               |
|                 | 40                                                                | 397.26                               |                 | 40                                                                | 372.46                               |
|                 | 50                                                                | 426.05                               |                 | 50                                                                | 408.96                               |
|                 | 60                                                                | 389.98                               |                 | 60                                                                | 359.58                               |
|                 | 70                                                                | 374.19                               |                 | 70                                                                | 342.90                               |
|                 | 80                                                                | 359.39                               |                 | 80                                                                | 330.46                               |

### Notes and References

S1 J. Sun, Q. Kan, Z. Li, G. Yu, H. Liu, X. Yang, Q. Huo and J. Guan, *RSC Adv.*, 2014, **4**, 2310–2317.
